# Supplementary material for: Migration of Type III Secretion System Transcriptional Regulators Links Gene Expression to Secretion
Source: PubMed Central journal article supplement (PMC6069116; doi:10.1128/mbio.01096-18), 2018-07-31
Supplement: mbo004184004st1.pdf [file mbo004184004st1.pdf]

**S1 Table. Strains and plasmids used in this study**

| Strains                                                   | Description                                                                                                                                                                                                                                               | Reference         |
|-----------------------------------------------------------|-----------------------------------------------------------------------------------------------------------------------------------------------------------------------------------------------------------------------------------------------------------|-------------------|
| <i>Escherichia coli</i>                                   |                                                                                                                                                                                                                                                           |                   |
| DH5a                                                      | F <sup>-</sup> <i>endA1 glnV44 thi-1 recA1 relA1 gyrA96 deoR nupG purB20</i> $\phi$ 80dlacZ $\Delta$ M15 $\Delta$ ( <i>lacZYA-argF</i> )U169, <i>hsdR17</i> ( <i>r<sub>K</sub><sup>-</sup>m<sub>K</sub><sup>+</sup></i> ), $\lambda$ <sup>-</sup>         | (1)               |
| BL21(DE3)                                                 | F <sup>-</sup> <i>ompT gal dcm lon hsdS<sub>B</sub></i> ( <i>r<sub>B</sub><sup>-</sup>m<sub>B</sub><sup>-</sup></i> ) $\lambda$ (DE3 [ <i>lacI lacUV5-T7p07 ind1 sam7 nin5</i> ]) [ <i>malB</i> <sup>+</sup> ] <sub>K-12</sub> ( $\lambda$ <sup>S</sup> ) | (2)               |
| <i>Pseudomonas syringae</i> pv. <i>phaseolicola</i>       |                                                                                                                                                                                                                                                           |                   |
| 1448a                                                     | Race 6, wild type strain                                                                                                                                                                                                                                  | (3)               |
| IOM71                                                     | $\Delta$ <i>hrpG</i> , race 6 derivative (Km <sup>R</sup> )                                                                                                                                                                                               | (4)               |
| IOM48                                                     | $\Delta$ <i>hrpV</i> , race 6 derivative (Km <sup>R</sup> )                                                                                                                                                                                               | (4)               |
| Pph $\Delta$ <i>hrpJ</i>                                  | $\Delta$ <i>hrpJ</i> , race 6 derivative (Km <sup>R</sup> )                                                                                                                                                                                               | This work         |
| Pph $\Delta$ <i>hrcC</i>                                  | $\Delta$ <i>hrcC</i> , race 6 derivative (Km <sup>R</sup> )                                                                                                                                                                                               | (5)               |
| <i>Erwinia amylovora</i>                                  |                                                                                                                                                                                                                                                           |                   |
| ATCC 49946                                                | Strain ATCC 49946, wild type                                                                                                                                                                                                                              | (6)               |
| <b>Plasmids</b>                                           |                                                                                                                                                                                                                                                           |                   |
| pPROEX-HTb                                                | Cloning vector, Amp <sup>R</sup>                                                                                                                                                                                                                          | Invitrogen        |
| pET16b                                                    | Cloning vector, Amp <sup>R</sup>                                                                                                                                                                                                                          | Novagen           |
| pET26b                                                    | Cloning vector, Km <sup>R</sup>                                                                                                                                                                                                                           | Novagen           |
| pET16b/MBP-TEV                                            | Cloning vector, Amp <sup>R</sup>                                                                                                                                                                                                                          | Prof. A. Economou |
| pPROPET                                                   | Cloning vector, Km <sup>R</sup>                                                                                                                                                                                                                           | (7)               |
| pBBR1-MCS-4                                               | Cloning vector, Amp <sup>R</sup>                                                                                                                                                                                                                          | (8)               |
| pPL6                                                      | Cosmid containing the <i>hrp/hrc</i> pathogenicity island from <i>Psp3121</i> , Trc <sup>R</sup>                                                                                                                                                          | (9)               |
| pET16b/HrpJ_Eamy                                          | pET16b expressing His <sub>10</sub> HrpJ from <i>Eamy</i> , Amp <sup>R</sup>                                                                                                                                                                              | This work         |
| pET16b/MBP-TEV/HrpJ_Eamy                                  | pET16b expressing His <sub>10</sub> MBP-TEV-HrpJ fusion from <i>Eamy</i> , Amp <sup>R</sup>                                                                                                                                                               | This work         |
| pPROPET/GVJ_PspGs                                         | pPROPET co-expressing His <sub>6</sub> HrpG,HrpV,HrpJ from <i>Psp</i> as a tricistronic plasmid-genes optimized for codon usage (Genescript), Km <sup>R</sup>                                                                                             | This work         |
| pPROPET/GV_PspGs                                          | pPROPET co-expressing His <sub>6</sub> HrpG,HrpV from <i>Psp</i> as a bicistronic plasmid-genes optimized for codon usage (Genescript), Km <sup>R</sup>                                                                                                   | This work         |
| pPROPET/GJ_Psp                                            | pPROPET co-expressing His <sub>6</sub> HrpG,HrpJ from <i>Psp</i> as a bicistronic plasmid, Km <sup>R</sup>                                                                                                                                                | This work         |
| pPROPET/VJ_Psp                                            | pPROPET co-expressing His <sub>6</sub> HrpV,HrpJ from <i>Psp</i> as a bicistronic plasmid, Km <sup>R</sup>                                                                                                                                                | This work         |
| pPROPET/GVJ_Eamy                                          | pPROPET co-expressing His <sub>6</sub> HrpG,HrpV,HrpJ from <i>Eamy</i> as a tricistronic plasmid, Km <sup>R</sup>                                                                                                                                         | This work         |
| pPROPET/GV_Eamy                                           | pPROPET co-expressing His <sub>6</sub> HrpG,HrpV from <i>Eamy</i> as a bicistronic plasmid, Km <sup>R</sup>                                                                                                                                               | This work         |
| pPROPET/GJ_Eamy                                           | pPROPET co-expressing His <sub>6</sub> HrpG,HrpJ from <i>Eamy</i> as a bicistronic plasmid, Km <sup>R</sup>                                                                                                                                               | This work         |
| pPROPET/VJ_Eamy                                           | pPROPET co-expressing His <sub>6</sub> HrpV,HrpJ from <i>Eamy</i> as a bicistronic plasmid, Km <sup>R</sup>                                                                                                                                               | This work         |
| pPROPET/G <sup>1-132</sup> U <sup>199-359</sup> _Psp      | pPROPET co-expressing His <sub>6</sub> HrpG <sup>1-132</sup> , HrcU <sup>199-359</sup> from <i>Psp</i> , Km <sup>R</sup>                                                                                                                                  | This work         |
| pPROPET/G <sup>1-132</sup> U <sup>199-359</sup> _APTH_Psp | pPROPET co-expressing His <sub>6</sub> HrpG <sup>1-132</sup> , HrcU <sup>199-359</sup> the latter carrying a N265A mutation, from <i>Psp</i> , Km <sup>R</sup>                                                                                            | This work         |
| pPROPET/GU <sup>199-360</sup> _Eamy                       | pPROPET co-expressing His <sub>6</sub> HrpG, HrcU <sup>199-360</sup> from <i>Eamy</i> , Km <sup>R</sup>                                                                                                                                                   | This work         |

|                                     |                                                                                                       |                    |
|-------------------------------------|-------------------------------------------------------------------------------------------------------|--------------------|
| pET16b/HrcU <sup>199-359</sup> _Psp | pET16b expressing His <sub>10</sub> HrcU <sup>199-359</sup> from <i>Psp</i> , Amp <sup>R</sup>        | Prof. A. Tampakaki |
| pET16b/HrpA2_Psp                    | pET16b expressing His <sub>10</sub> HrpA2 from <i>Psp</i> , Amp <sup>R</sup>                          | Prof. A. Tampakaki |
| pET26b/HrpZ1_Psp                    | pET26b expressing HrpZ1His <sub>6</sub> from <i>Psp</i> , Km <sup>R</sup>                             | Prof. A. Tampakaki |
| pET26b/HrpJ_Eamy                    | Intermediate plasmid, donor of HrpJ insert for pPROPET/GVJ_Eamy plasmid construction, Km <sup>R</sup> | This work          |

## References

1. Grant SGN, Jessee J, Bloom FR, Hanahan D. 1990. Differential plasmid rescue from transgenic mouse DNAs into Escherichia coli methylation-restriction mutants. Proc Natl Acad Sci U S A 87:4645–4649.
2. Wood WB. 1966. Host specificity of DNA produced by Escherichia coli: bacterial mutations affecting the restriction and modification of DNA. J Mol Biol 16:118–133.
3. Joardar V, Joardar V, Lindeberg M, Lindeberg M, Jackson R, Jackson RW, Selengut J, Dodson R, Brinkac LM, Daugherty SC, Deboy R, Durkin a S, Giglio MG, Madupu R, Nelson WC, Rosovitz MJ, Sullivan S, Crabtree J, Creasy T, Davidsen T, Haft DH, Zafar N, Zhou L, Halpin R, Holley T, Khouri H, Feldblyum T, White O, Fraser CM, Chatterjee AK, Cartinhour S, Schneider DJ, Collmer A, Buell CR. 2005. Whole-Genome Sequence Analysis of. J Bacteriol 187:6488–6498.
4. Ortiz-Martin I, Thwaites R, Mansfield JW, Beuzon CR. 2010. Negative regulation of the Hrp type III secretion system in Pseudomonas syringae pv. phaseolicola. Mol Plant Microbe Interact 23:682–701.
5. Ortiz-Martín I, Macho AP, Lambersten L, Ramos C, Beuzón CR. 2006. Suicide vectors for antibiotic marker exchange and rapid generation of multiple knockout mutants by allelic exchange in Gram-negative bacteria. J Microbiol Methods 67:395–407.
6. Sebahia M, Bocsanczy AM, Biehl BS, Quail MA, Perna NT, Glasner JD, DeClerck GA, Cartinhour S, Schneider DJ, Bentley SD, Parkhill J, Beer S V. 2010. Complete genome sequence of the plant pathogen Erwinia amylovora strain ATCC 49946. J Bacteriol 192:2020–2021.
7. Gazi AD, Charova S, Aivaliotis M, Panopoulos NJ, Kokkinidis M. 2015. HrpG and HrpV proteins from the Type III secretion system of Erwinia amylovora form a stable heterodimer. FEMS Microbiol Lett 362.
8. Kovach ME, Elzer PH, Hill DS, Robertson GT, Farris MA, Roop RM, Peterson KM. 1995. Four new derivatives of the broad host range cloning vector PBBR1MCS, carrying different antibiotic resistance cassettes. Gene 166:175–176.
9. Lindgren PB, Peet RC, Panopoulos NJ. 1986. Gene cluster of Pseudomonas syringae pv. “phaseolicola” controls pathogenicity of bean plants and hypersensitivity on nonhost plants. J Bacteriol 168:512–522.
