# Supplementary material for: Migration of Type III Secretion System Transcriptional Regulators Links Gene Expression to Secretion
Source: PubMed Central journal article supplement (PMC6069116; doi:10.1128/mbio.01096-18), 2018-07-31
Supplement: mbo004184004st2.pdf [file mbo004184004st2.pdf]

**S2 Table. Primers used in this study**

| pPROPET<br>co-expression plasmids                       | MCS1                                                                                                                                                                                                                           | MCS2                                                                                                                                                                                                                                |
|---------------------------------------------------------|--------------------------------------------------------------------------------------------------------------------------------------------------------------------------------------------------------------------------------|-------------------------------------------------------------------------------------------------------------------------------------------------------------------------------------------------------------------------------------|
| pPROPET/G <sup>1-132</sup> U <sup>199-359</sup><br>_Psp | <p><i>hrpG</i><sup>1-132</sup> (template pPROEX/<i>hrpG</i>)</p> <p>Forward: 5' –<br/>GACCAATCATGAGCTCGATGGATTTC-3'<br/>(ligated to compatible vector' s NcoI site)</p> <p>Reverse: 5' –<br/>AGGGTCGTGCGGCCGCATCACGCGG- 3'</p> | <p><i>hrcU</i><sup>199-359</sup> (template pET16b/<i>hrcU</i><sup>199-359</sup>)</p> <p>Forward: 5' -<br/>CTGGTGCAAGTCATATGAGTGAAAAAACCGA-3'</p> <p>Reverse: 5'-CCTGTTACGCCTGGATCCCAGCTCC-3'</p>                                    |
| pPROPET/VJ_Psp                                          | <p><i>hrpV</i> (template pET16b/<i>hrpV</i>)</p> <p>Forward: 5' –<br/>AGGATTAGTCATGATTGAGGTAAAG-3' (ligated<br/>to compatible vector' s NcoI site)</p> <p>Reverse: 5' – CGTCTAGAAGCTTGCGTCC-3'</p>                             | <p><i>hrpJ</i><br/>(template pPROEX/<i>hrpJ</i>)</p> <p>Forward: 5'-GCTCAGAACCGTCATATGAAAATCG-3'</p> <p>Reverse: 5'-CGACAGGGCAAGCTTGTTGAGAAAG-3'<br/>(ligated blunt to vector' s SacI site after Klenow<br/>treatment)</p>          |
| pPROPET/GJ_Eamy                                         | <p><i>hrpG</i> (template: genomic DNA <i>Eamy</i>)</p> <p>Forward: 5' –<br/>GCCATCATTCATGAGATCAACTGAATTGCAG<br/>C – 3'</p> <p>Reverse: 5' -<br/>GCAACTCTCGAGTCTCAACCATGGTTTCC -3'</p>                                          | <p><i>hrpJ</i> (template: genomic DNA <i>Eamy</i>)</p> <p>Forward: 5' – GAAGGTTGCGCCATATGAAAATTGC –<br/>3'</p> <p>Reverse: 5' - GCCAGACAAACAGAGCTCTCATTTA -<br/>3'</p>                                                              |
| pPROPET/GV_Eamy                                         | <p><i>hrpG</i><br/>(as in 3)</p>                                                                                                                                                                                               | <p><i>hrpV</i> (template: genomic DNA <i>Eamy</i>)</p> <p>Forward: 5'-GTATCGGCATATGAATAATCCTTGC-3'</p> <p>Reverse: 5'-CCGGC GAATTCAGAAAAATAACC-3'</p>                                                                               |
| pPROPET/GVJ_Eamy                                        | <p><i>hrpG</i><br/>(as in 3)</p>                                                                                                                                                                                               | <p><i>hrpV/hrpJ</i><br/><i>hrpV</i> as in 4.<br/><i>hrpJ</i> was first subcloned to pET26b using primers in 3,<br/>digested from there XbaI(blunt)/SacI and ligated to<br/>pPROpET/<i>hrpG/hrpV</i> in sites EcoRI(blunt)/SacI)</p> |
| pPROPET/VJ_Eamy                                         | <p><i>hrpV</i>(template genomic DNA <i>Eamy</i>)</p> <p>Forward: 5' –<br/>GGTATCGGTCCATGGATAATCCTTG – 3'</p> <p>Reverse: 5' -<br/>GAAAGGACGCAAGCTTGGATCAATC -3'</p>                                                            | <p><i>hrpJ</i> (template genomic DNA <i>Eamy</i>)<br/>(as in 3)</p>                                                                                                                                                                 |
| pPROPET/GU <sup>199-360</sup><br>_Eamy                  | <p><i>hrpG</i><br/>(as in 3)</p>                                                                                                                                                                                               | <p><i>hrcU</i><sup>199-360</sup> (template: genomic DNA <i>Eamy</i>)</p> <p>Forward: 5' -<br/>GCTGGTACTGCATATGCTGGACTTCGGCC -3'</p> <p>Reverse: 5'-<br/>GGTAATAGTTGAGCTCATTCGGCTTCCAGTTC -3'</p>                                    |

| Site directed mutagenesis plasmid 1 derivative            | Forward primer                                     | Reverse primer                                   |
|-----------------------------------------------------------|----------------------------------------------------|--------------------------------------------------|
| pPROPET/G <sup>1-132</sup> U <sup>199-359</sup> _APTH_Psp | 5' –<br>GACATGCTGCTGGTGGCGCCGACGCACTAC<br>GCGG- 3' | 5' –<br>CCGCGTAGTGCGTCCGGCCACCAGCAGCATGTC-<br>3' |
| <b><i>Psp hrpJ</i> knock-out allele generation</b>        |                                                    |                                                  |
| A1                                                        | 5'-CTGGCGATACATTTGCGG-3'                           |                                                  |
| A2                                                        | 5'-CCCTATAGTGAGTCGAATTCAGGACGGTCTGAGCCTG-3'        |                                                  |
| B1                                                        | 5'-CAGGTTGGCGCGCAGATC-3'                           |                                                  |
| B2                                                        | 5'-GAATTCGACTCACTATAGGGATCAAGTCATCAACTTTC-3'       |                                                  |
| RT-qPCR analysis                                          | Forward primer                                     | Reverse primer                                   |
| <i>hrpL</i> (159 bp amplicon)                             | 5' –AGCCGCAGACCTGGTTGTG- 3'                        | 5' -ATTGCCTGTGCCCGTCTACC3-'                      |
| 16S rDNA (157 bp amplicon)                                | 5'-GGAATCTGCCTGGTAGTGGGG- 3'                       | 5'-GGCTCACCAAGGCGACGAT 3-'                       |
